# Supplementary material
Source: PubMed Central journal article supplement (PMC3234866)
Supplement: supp_M111.302133_jbc.M111.302133-1.pdf [file supp_M111.302133_jbc.M111.302133-1.pdf]

Supplemental Material

**A novel mechanism of RNA repair by RtcB via sequential 2',3'-cyclic phosphodiesterase and 3'-phosphate/5'-hydroxyl ligation reactions**

Naoko Tanaka, Anupam K. Chakravarty, Bill Maughan, and Stewart Shuman

Molecular Biology Program, Sloan-Kettering Institute, New York, NY 10065

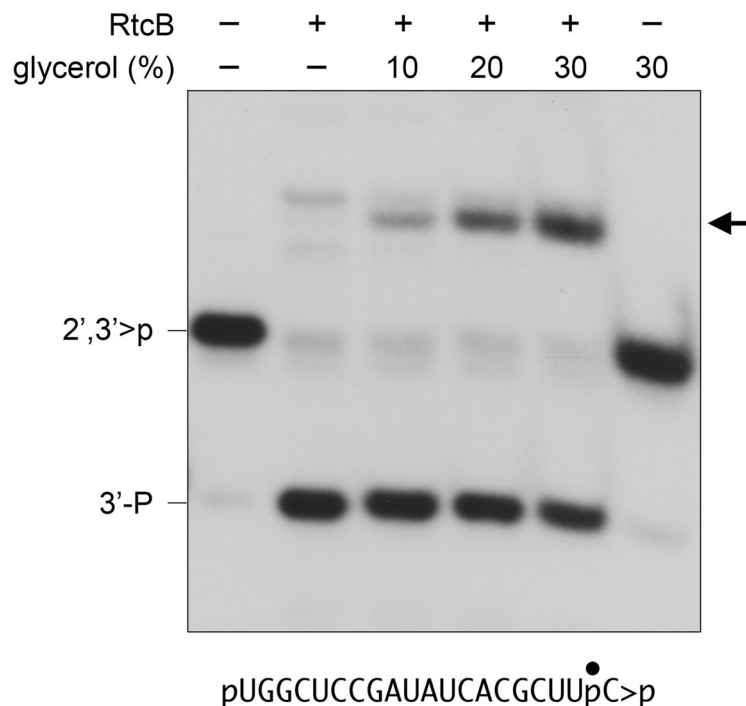

Figure S1. **Glycerol as a nucleophile for the RtcB CPDase reaction.** Reaction mixtures (10  $\mu$ l) containing 50 mM Tris-HCl (pH 8.0), 0.1 mM GTP, 2 mM  $MnCl_2$ , 20 nM  $^{32}P$ -labeled 20-mer pRNA>p as shown, and 1  $\mu$ M RtcB (where indicated by +) were supplemented with 10%, 20%, or 30% (v/v) glycerol. The reaction mixtures were incubated at 37°C for 30 min, then quenched with EDTA. The products were digested with RNase T1 and then resolved by PAGE. A novel radiolabeled T1 fragment (denoted by the arrow at *right*), formation of which was RtcB-dependent and proportional to glycerol concentration, is a putative glycerololysis reaction product,  $HO-CUU-pC_3-p$ -glycerol.

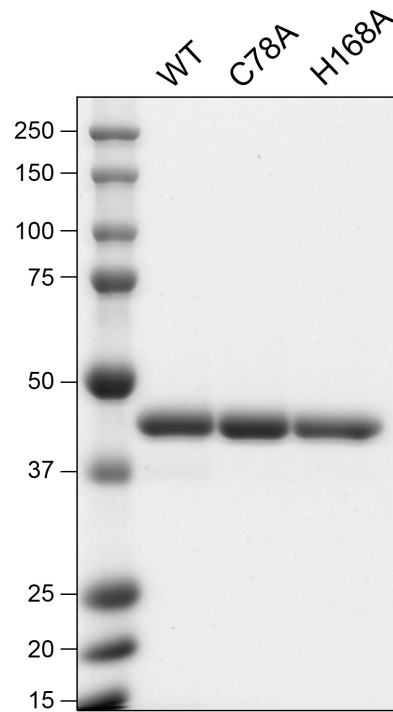

Figure S2. **Purification of wild-type RtcB and mutants C78A and H168A.** Aliquots (4.5  $\mu$ g) of the Superdex 200 preparations of the indicated RtcB proteins were analyzed by SDS-PAGE. The polypeptides were visualized by staining with Coomassie blue dye. The positions and sizes (kDa) of marker polypeptides are indicated at left.

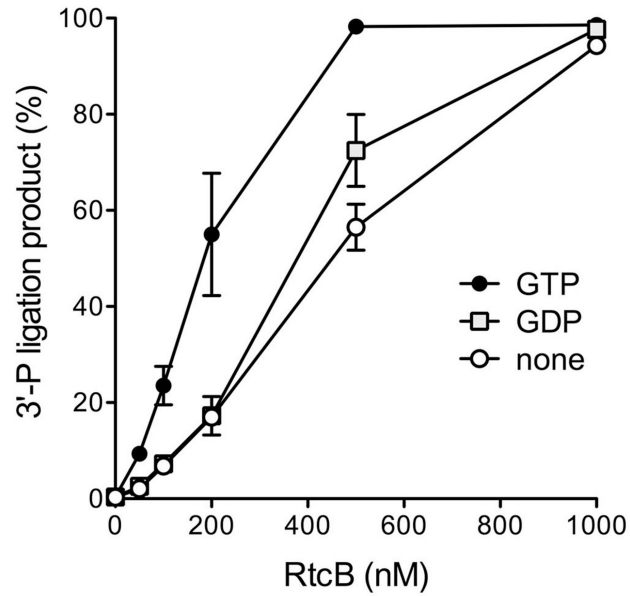

Figure S3. **GTP stimulates 3'-phosphate ligation activity.** Ligase reaction mixtures (10  $\mu$ l) containing 50 mM Tris-HCl (pH 8.0), 2 mM  $MnCl_2$ , 20 nM  $^{32}P$ -labeled 20-mer  $H_0RNAP$ , either 0, 50, 100, 200, 500 or 1000 nM RtcB, and either 0.1 mM GTP, 0.1 mM GDP or no added nucleotide (none) were incubated at 37°C for 30 min. The products were digested with RNase T1 and then analyzed by PAGE. The extents of product formation are plotted as a function of enzyme concentration. Each datum is the average of three separate RtcB titration experiments  $\pm$ SEM.
